# Supplementary material
Source: MDPI journal article supplement (https://www.mdpi.com/2076-3417/13/2/727)
Supplement: s1 [file s1]

## SUPPLEMENTARY DESCRIPTION

The supplemental materials include the definition of attribute-hiding, the zero-knowledge proof and correctness analysis of ABCT and ABCB scheme, the correctness analysis and security analysis of TIPFE scheme, and the correctness definition, zero-knowledge proof and security analysis of PriSign scheme.

### A. ATTRIBUTE-HIDING

**Attribute-Hiding.** The attribute-hiding [29] is defined by experiment  $Exp^{ath-b}$  in Fig.1. The IPFE scheme satisfies attribute-hiding, if for any probability polynomial-time (PPT) adversary  $\mathcal{A}$ , there is a negligible function  $\epsilon(\lambda)$  such that:

$$Adv^{ath} = \left| \Pr \left[ Exp^{ath-1}(\mathcal{A}, \lambda) = 1 \right] - \frac{1}{2} \right| \leq \epsilon(\lambda)$$

$Exp^{ath-b}(\mathcal{A}, \lambda)$ :

1.  $(sk, pk) \leftarrow \text{IPFE.Setup}(1^\lambda)$ ;
2.  $(M_0, M_1, \vec{u}, st) \leftarrow \mathcal{A}(pk)$  and  $\vec{u} \in \Sigma$ ;
3.  $\mathcal{A}$  requests policy keys for any characteristic vectors  $\vec{v}_i$ :  $dk_{\vec{v}_i} \leftarrow \text{IPFE.Extract}(sk, \vec{v}_i)$ ,  $\langle \vec{u}, \vec{v}_i \rangle \neq 0$ , where  $i \in [1, N]$ ;
4.  $C \leftarrow \text{IPFE.Enc}(pk, \vec{u}, M_b)$ ;
5.  $b^* \leftarrow \mathcal{A}(st, C, \{dk_{\vec{v}_i}\}_{i \in [1, N]})$ ;
6. If  $b = b^*$ , return 1;
7. Return 0.

Fig. 1: Attribute-Hiding

### B. ABCT

In this section, we present the details of ZKSoK and the correctness analysis of the ABCT scheme.

#### B.1 Zero-Knowledge Signature of Knowledge

##### B.1.1 Details of $\Pi_1$ .

The proof of  $\Pi_1 = \text{ZKSoK}\{usk : upk = g^{usk} \wedge utk = \tilde{g}^{usk}\}$  is presented as below.

**Prove:** choose  $z \xleftarrow{R} \mathbb{Z}_p^*$ , compute  $R = g^z, \tilde{R} = \tilde{g}^z, c = \text{HASH}(upk, utk, R, \tilde{R})$ ,  $s = z - usk \cdot c$ , and output  $\Pi_1 = (c, s)$ .

**Verify:** if  $c = \text{HASH}(upk, utk, g^s \cdot upk^c, \tilde{g}^s \cdot utk^c)$ , output 1, 0 otherwise.

##### B.1.2 Details of $\Pi_2$ .

The proof of  $\Pi_2 = \text{ZKSoK}\{(usk, r_2, \{m_j\}_{j \in [1, q]/\mathcal{D}}) : \mu = \sigma_1^{usk} \wedge \nu = \sigma_1^{r_2} \wedge \kappa = \tilde{X} \prod_{j \in [1, q]/\mathcal{D}} \tilde{Y}_j^{m_j} \tilde{g}^{r_2}\}(\text{CTX})$  is presented as below.

**Prove:** choose  $(z_k, z_2, \{t_j\}_{j \in [1, q]/\mathcal{D}}) \xleftarrow{R} \mathbb{Z}_p^*$ , compute  $R_1 = \sigma_1^{z_k}, R_2 = \sigma_1^{z_2}, R_3 = \prod_{j \in [1, q]/\mathcal{D}} \tilde{Y}_j^{t_j} \tilde{g}^{z_2}$ ,  $c = \text{HASH}(\sigma_1', \tilde{X}, \{\tilde{Y}_j\}_{j \in [1, q]/\mathcal{D}}, R_1, R_2, R_3, \text{CTX})$ ,  $s_k = z_k - c \cdot usk$ ,  $s_2 = z_2 - c \cdot r_2$ ,  $\{sm_j = t_j - c \cdot m_j\}_{j \in [1, q]/\mathcal{D}}$ , and output  $\Pi_2 = (c, s_k, s_2, \{sm_j\}_{j \in [1, q]/\mathcal{D}})$ .

**Verify:** if  $c = \text{HASH}(\sigma_1', \tilde{X}, \{\tilde{Y}_j\}_{j \in [1, q]/\mathcal{D}}, \sigma_1^{s_k} \mu^c, \sigma_1^{s_2} \nu^c, \prod_{j \in [1, q]/\mathcal{D}} \tilde{Y}_j^{sm_j} \tilde{g}^{s_2} (\kappa / \tilde{X})^c, \text{CTX})$ , output 1, 0 otherwise.

### B.2 Correctness Analysis

An ABCT scheme is correct if it satisfies: (1) the credential issued by the issuer can be verified by the user; (2) an honest user's credential presentations can be verified by the verifier; (3) the real identities of the users who computed credential presentations can be traced by the issuer.

For the first property, the equation  $e(\sigma_2, \tilde{g}) = e(\sigma_1, \tilde{X} \tilde{Y}_0^{usk} \prod_{j=1}^q \tilde{Y}_j^{m_j})$  holds, since we have:

$$\begin{aligned} e(\sigma_2, \tilde{g}) &= e((upk)^{r \cdot y_0} g^{r \cdot (x + \sum_{j=1}^q m_j y_j)}, \tilde{g}) \\ &= e(g^{r(x + usk \cdot y_0 + \sum_{j=1}^q m_j y_j)}, \tilde{g}) \\ &= e(g^r, \tilde{g}^{x + usk \cdot y_0 + \sum_{j=1}^q m_j y_j}) \\ &= e(\sigma_1, \tilde{X} \tilde{Y}_0^{usk} \prod_{j=1}^q \tilde{Y}_j^{m_j}) \end{aligned} \quad (1)$$

For the second property, the equation  $e(\sigma'_2 \nu, \tilde{g}) = e(\sigma'_1, \kappa \prod_{j \in \mathcal{D}} \tilde{Y}_j^{m_j}) e(\mu, \tilde{Y}_0)$  holds, since we have:

$$\begin{aligned} e(\sigma'_1, \kappa \prod_{j \in \mathcal{D}} \tilde{Y}_j^{m_j}) e(\mu, \tilde{Y}_0) &= e(\sigma'_1, \tilde{X} \prod_{j \in [1, q]/\mathcal{D}} \tilde{Y}_j^{m_j} \tilde{g}^{r_2} \prod_{j \in \mathcal{D}} \tilde{Y}_j^{m_j}) e(\sigma_1^{usk}, \tilde{Y}_0) \\ &= e(\sigma'_1, \tilde{X} \prod_{j \in [1, q]} \tilde{Y}_j^{m_j} \tilde{g}^{r_2}) e(\sigma_1', \tilde{Y}_0^{usk}) \\ &= e(\sigma'_1, \tilde{X} \tilde{Y}_0^{usk} \prod_{j \in [1, q]} \tilde{Y}_j^{m_j}) e(\sigma_1', \tilde{g}^{r_2}) \\ &= e(\sigma'_2, \tilde{g}) e(\nu, \tilde{g}) \\ &= e(\sigma'_2 \nu, \tilde{g}) \end{aligned} \quad (2)$$

For the third property, the tracing is correct because we have:

$$e(\mu, \tilde{g}) = e(\sigma_1^{usk}, \tilde{g}) = e(\sigma_1', utk) \quad (3)$$

Eqs. 1, Eqs. 2 and Eqs. 3 are used to show the correctness of the ABCT scheme.

### C. ABCB

In this section, we present the details of ZKSoK and the correctness analysis of the ABCB scheme.

#### C.1 Zero-Knowledge Signature of Knowledge

##### C.1.1 Details of $\Pi_3$ .

The proof of  $\Pi_3 = \text{ZKSoK}\{(d, r_1, \dots, r_{l'}, m_1, \dots, m_{l'}) : D = g^d, C_j = (g^{r_j}, D^{r_j} h^{m_j}) \forall j \in [1, l']\}$  is presented as below.

**Prove:** choose  $(z_d, z_1, \dots, z_{l'}, t_1, \dots, t_{l'}) \xleftarrow{R} \mathbb{Z}_p^*$ , compute  $R_d = g^{z_d}, \{R_{j,0} = g^{z_j}, R_{j,1} = D^{z_j} h^{t_j}\}_{j \in [1, l']}, c = \text{HASH}(D, h, \{C_{j,0}, C_{j,1}\}_{j \in [1, l']}, D_d, \{R_{j,0}, R_{j,1}\}_{j \in [1, l']})$ ,  $s_d = z_d - c \cdot d$ ,  $\{sr_j = z_j - c \cdot r_j, sm_j = t_j - c \cdot m_j\}_{j \in [1, l']}$ , and output  $\Pi_3 = (c, s_d, \{sr_j, sm_j\}_{j \in [1, l']})$ .

**Verify:** if  $c = \text{HASH}(D, h, \{C_{j,0}, C_{j,1}\}_{j \in [1, l']}, g^{s_d} D^c, \{g^{sr_j} C_{j,0}^c, D^{sr_j} h^{sm_j} C_{j,1}^c\}_{j \in [1, l']})$ , output 1, 0 otherwise.

### C.1.2 Details of $\Pi_4$ .

The proof of  $\Pi_4 = \text{ZKSoK}\{(r_2, \{m_j\}_{j \in [1, l]/\mathcal{D}}) : \nu' = \tau_1^{r_2} \wedge \kappa' = \tilde{A} \prod_{j \in [1, l]/\mathcal{D}} \tilde{B}_j^{m_j} \tilde{g}^{r_2}\}$  is presented as below.

**Prove:** choose  $(z_2, \{t_j\}_{j \in [1, l]/\mathcal{D}}) \xleftarrow{R} \mathbb{Z}_p^*$ , compute  $R_2 = \tau_1^{z_2}, R_3 = \prod_{j \in [1, l]/\mathcal{D}} \tilde{B}_j^{t_j} \tilde{g}^{z_2}, c = \text{HASH}(\tau_1', \tilde{A}, \{\tilde{B}_j\}_{j \in [1, l]/\mathcal{D}}, R_2, R_3), s_2 = z_2 - c \cdot r_2, \{sm_j = t_j - c \cdot m_j\}_{j \in [1, l]/\mathcal{D}}$ , and output  $\Pi_4 = (c, s_2, \{sm_j\}_{j \in [1, l]/\mathcal{D}})$

**Verify:** if  $c = \text{HASH}(\tau_1', \tilde{A}, \{\tilde{B}_j\}_{j \in [1, l]/\mathcal{D}}, \tau_1'^{s_2} \nu'^c, \prod_{j \in [1, l]/\mathcal{D}} \tilde{B}_j^{sm_j} \tilde{g}^{s_2} (\kappa'/\tilde{A})^c)$ , output 1, 0 otherwise.

### C.2 Correctness Analysis

An ABCB scheme is correct if it satisfies: 1) the credential issued by the issuer can be verified by the user; 2) an honest user's credential presentations can be verified by the verifier.

For the first property, the equation  $e(\tau_2, \tilde{g}) = e(\tau_1, \tilde{A} \prod_{j=1}^l \tilde{B}_j^{m_j})$  holds, since we have:

$$\begin{aligned}
& e(\tau_2, \tilde{g}) \\
&= e(\tau_1' \tau_2'^{-d}, \tilde{g}) \\
&= e(h^a \prod_{j=1}^{l'} C_{j,1}^{b_j} \cdot h^{\sum_{j=l'+1}^{l'} b_j m_j} (\prod_{j=1}^{l'} C_{j,0}^{b_j})^{-d}, \tilde{g}) \\
&= e((h^a \prod_{j=1}^{l'} (D^{r_j} h^{m_j})^{b_j} h^{\sum_{j=l'+1}^{l'} b_j m_j} (\prod_{j=1}^{l'} g^{r_j b_j})^{-d}, \tilde{g}) \\
&= e(h^a \prod_{j=1}^l h^{m_j b_j} \prod_{j=1}^{l'} D^{r_j b_j} \prod_{j=1}^{l'} g^{r_j b_j (-d)}, \tilde{g}) \\
&= e(h^a \prod_{j=1}^l h^{m_j b_j}, \tilde{g}) \\
&= e(h, \tilde{g}^{a + \sum_{j=1}^l m_j b_j}) \\
&= e(\tau_1, \tilde{A} \prod_{j=1}^l \tilde{B}_j^{m_j})
\end{aligned} \tag{4}$$

For the second property, the equation  $e(\tau_2' \nu', \tilde{g}) = e(\tau_1', \kappa' \prod_{j \in \mathcal{D}} \tilde{B}_j^{m_j})$  holds, since we have:

$$\begin{aligned}
& e(\tau_1', \kappa' \prod_{j \in \mathcal{D}} \tilde{B}_j^{m_j}) \\
&= e(\tau_1', \tilde{A} \prod_{j \in [1, l]/\mathcal{D}} \tilde{B}_j^{m_j} \tilde{g}^{r_2} \prod_{j \in \mathcal{D}} \tilde{B}_j^{m_j}) \\
&= e(\tau_1', \tilde{A} \prod_{j \in [1, l]} \tilde{B}_j^{m_j} \tilde{g}^{r_2}) \\
&= e(\tau_1', \tilde{A} \prod_{j \in [1, l]} \tilde{B}_j^{m_j}) e(\tau_1', \tilde{g}^{r_2}) \\
&= e(\tau_2', \tilde{g}) e(\nu', \tilde{g}) \\
&= e(\tau_2' \nu', \tilde{g})
\end{aligned} \tag{5}$$

Eqs. 4 and Eqs. 5 are used to show the correctness of the ABCB scheme.

## D. TIPFE

In this section, we present the details of correctness analysis and formal proof of the TIPFE scheme.

### D.1 Correctness Analysis

A TIPFE scheme is correct if it satisfies: (1) the key extracted by each policymaker for verifiers is correct; (2) the aggregation of  $t$  shares of policy key is correct; (3) the decryption is correct if the attribute vector matches the policy i.e.  $\langle \vec{u}, \vec{v} \rangle = 0$ .

For the first property, a received share of policy key is  $dk_{id, \vec{v}, i}$ , and the verifier verifies it as  $e(g, dk_{id, \vec{v}, i}) = P_i^{\theta_{id}} \prod_{j=1}^k H_{i,j}^{v_j}$ . This equation holds, since we have:

$$\begin{aligned}
& e(g, dk_{id, \vec{v}, i}) = e(g, \tilde{g}^{\sum_{j=1}^k s_{i,j} v_j + e_i \theta_{id}}) \\
&= e(g, \tilde{g}^{e_i})^{\theta_{id}} \prod_{j=1}^k e(g, \tilde{g}^{s_{i,j}})^{v_j} \\
&= P_i^{\theta_{id}} \prod_{j=1}^k H_{i,j}^{v_j}
\end{aligned} \tag{6}$$

For the second property, a complete policy key should satisfy the equation  $dk_{id, \vec{v}} = \tilde{g}^{\sum_{j=1}^k s_j v_j + e \theta_{id}}$ . This equation holds since we have:

$$\begin{aligned}
& dk_{id, \vec{v}} = \prod_{i \in [1, t]} dk_{id, \vec{v}, i}^{\lambda_i} \\
&= \tilde{g}^{\sum_{i \in [1, t]} \lambda_i (\sum_{j=1}^k s_{i,j} v_j + e_i \theta_{id})} \\
&= \tilde{g}^{\sum_{i \in [1, t]} \sum_{j=1}^k \lambda_i s_{i,j} v_j + \sum_{i \in [1, t]} \lambda_i e_i \theta_{id}} \\
&= \tilde{g}^{\sum_{j=1}^k s_j v_j + e \theta_{id}}
\end{aligned} \tag{7}$$

For the third property, if  $\langle \vec{u}, \vec{v} \rangle = 0$ , decryption is successful since:

$$\begin{aligned}
& C_0 \cdot \left( \frac{\prod_{j=1}^k C_{2,j}^{v_j}}{e(C_{1,t}, tk_{id, \vec{v}})} \right)^{\theta_{id}^{-1}} \\
&= M \cdot P^r \cdot \left( \frac{(H_1^r G^{u_1})^{v_1} (H_2^r G^{u_2})^{v_2} \cdot (H_k^r G^{u_k})^{v_k}}{e(g^r, tk_{id, \vec{v}})} \right)^{\theta_{id}^{-1}} \\
&= M \cdot (G^{e \cdot r \theta_{id}} \frac{G^{\langle \vec{u}, \vec{v} \rangle} G^{r \langle \vec{s}, \vec{v} \rangle}}{e(g, \tilde{g})^{r \langle \vec{s}, \vec{v} \rangle + e \theta_{id}}})^{\theta_{id}^{-1}} \\
&= M
\end{aligned} \tag{8}$$

Eqs. 6, Eqs. 7 and Eqs. 8 are used to show the correctness of the TIPFE scheme.

### D.2 Security Analysis

**Theorem 4.1:** Our TIPFE scheme satisfies attribute-hiding under the BDDH assumption.

**Proof:** Let  $(g^{w_a}, g^{w_b}, \tilde{g}^{w_a}, \tilde{g}^{w_c}, e(g, \tilde{g})^{w_z})$  be a BDDH challenge in  $\mathcal{BL}$ .  $\mathcal{A}$  provides two distinct messages  $M_0$  and  $M_1$ , and an attribute vector  $\vec{u}$ . The simulator  $\mathcal{S}$  progresses as follows:

–  $\mathcal{S}$  finds a  $(k-1)$  basis of subspace  $(\vec{u})^\perp$  and denotes the basis by  $(\mu_1, \mu_2, \dots, \mu_{k-1})$ .  $\mathcal{S}$  chooses  $z_i \xleftarrow{R} \mathbb{Z}_p^*$  for  $i \in [1, k-1]$ .

– For  $i \in [1, k]$ ,  $\mathcal{S}$  computes  $\nu_i = \alpha_i \vec{u} + \sum_{i=1}^{k-1} \lambda_i \mu_i$  to obtain the canonical basis  $(\nu_1, \dots, \nu_k)$ , where  $\langle \nu_i, \vec{u} \rangle = \alpha_i \cdot \|\vec{u}\|^2$ . Then,  $\mathcal{S}$  computes  $\alpha = \sum_{i=1}^k \nu_i \alpha_i = 1/\|\vec{u}\|^2 \cdot \vec{u}$ .

–  $\mathcal{S}$  sets  $G = e(g, \tilde{g}^{w_c})$ .  $\forall i \in [1, k]$ ,  $\mathcal{S}$  computes  $H_i = e((g^{w_a})^{\alpha_i} g^{\sum_{j=1}^{k-1} z_j \lambda_j}, \tilde{g}^{w_c}) = G^{a \alpha_i + \sum_{j=1}^{k-1} z_j \lambda_j}$ . Note that  $s_i = a \alpha_i + \sum_{j=1}^{k-1} z_j \lambda_j$ .

–  $\mathcal{S}$  chooses  $e \xleftarrow{R} \mathbb{Z}_p^*$ , computes  $P = G^e$ , and sets  $pk = (G, P, H_1, H_2, \dots, H_k)$ .

– For a policy  $\vec{v} = (v_1, \dots, v_k) \in (\vec{u})^\perp$ ,  $\mathcal{S}$  computes  $\sum_{j=1}^k s_j v_j = \sum_{j=1}^k v_j z_j \lambda_j$ . To achieve the threshold key distribution,  $\mathcal{S}$  chooses 2 polynomials of degree  $t-1$ :  $f_{sv}, f_e$ , where  $f_{sv}(0) = \sum_{j=1}^k s_j v_j$ ,  $f_e(0) = e$ , and  $\forall i \in [1, k]$  computes  $sv_i = f_{sv}(i)$ ,  $e_i = f_e(i)$ .

– For identity  $id$  and policy  $\vec{v}$ ,  $\mathcal{S}$  computes  $\theta_{id} = \text{HASH}(id)$  and returns  $dk_{id, \vec{v}, i} = \tilde{g}^{sv_i + e_i \theta_{id}}$ .

– In the challenge stage, for  $b \in \{0, 1\}$ ,  $\mathcal{S}$  chooses  $r' \in \mathbb{Z}_p^*$  and returns  $C^* = (C_0^*, C_1^*, C_2^*)$ , where  $C_0^* = M_b e(g^{w_b \cdot r'}, \tilde{g}^{w_c})$ ,  $C_1^* = g^{w_b \cdot r'}$ ,  $C_{3,i}^* = e(g, \tilde{g})^{w_z} e((g^{w_b \cdot r'})^{\sum_{j=1}^{k-1} z_j \lambda_j}, \tilde{g}^{w_c}) G^{u_i}$ ,  $i \in [1, k]$ , which implicitly defines  $r = r' \cdot b$ .

If  $w_a \cdot w_b \cdot w_c = w_z$ , then we can see that  $(C_0^*, C_1^*, C_2^*)$  are identically distributed as in the TIPFE.Enc algorithm, because  $C_0^* = M_b G^r$ ,  $C_1^* = g^r$ ,  $C_{3,i}^* = e(g, \tilde{g})^{w_z} e((g^{w_b \cdot r'})^{\sum_{j=1}^{k-1} z_j \lambda_j}, \tilde{g}^{w_c}) G^{u_i}$ ,  $i \in [1, k]$ . Otherwise,  $(C_0^*, C_1^*, C_2^*)$  are randoms for  $\mathcal{A}$ . Since if  $\mathcal{A}$  can break the attribute-hiding with non-negligible probability,  $\mathcal{S}$  can break the BDDH problem with equal probability.

## E. PRISIGN

In this section, we present the details of correctness definition, ZKSoK, and security analysis of the PriSign scheme.

### E.1 Formal Correctness Definition

**Correctness.** A PriSign scheme is correct if it satisfies:

$$Pr \left[ \begin{array}{l} \text{PriSign.Setup}(1^\lambda, q, n, t, k) \rightarrow (pp, msk, mpk, \mathcal{L}); \\ \text{PriSign.IssuerKeyGen}() \rightarrow (isk, ipk); \\ \text{PriSign.IssuerReg}(\text{l}(isk, ipk) \leftrightarrow \text{CA}(msk, mpk)) \rightarrow icred; \\ \text{PriSign.PolMakKeyGen}(msk, mpk) \rightarrow \{psk_i, pvk_i\}_{i \in [1, n]}; \\ \{ \text{PriSign.IssPolKey}(psk_i, vid, \vec{v}) \rightarrow tk_{vid, \vec{v}, i} \}_{i \in [1, t]}; \\ \text{PriSign.AggrPolKey}(vid, \vec{v}, \{tk_{vid, \vec{v}, i}, mpk_i\}_{i \in [1, t]}) \rightarrow tk_{vid, \vec{v}}; \\ \text{PriSign.UserKeyGen}() \rightarrow (usk, upk, utk); \\ \text{PriSign.UserReg}(\text{U}(uid, usk, upk, utk, \{m_j\}_{j \in [1, q]}) \leftrightarrow \text{CA}(msk, mpk, \mathcal{L})) \rightarrow (ucred, \mathcal{L}'); \\ \text{PriSign.ObtTkt}(\text{U}(usk, upk, ucred, \{m_j\}_{j \in [1, q]}, \mathcal{D}, \text{CTX}) \leftrightarrow \text{l}(isk, ipk, icred)) \rightarrow (pst, tkt, dsid, VP); \\ \text{PriSign.SignOn}(tkt, dsid, VP, \vec{u}, \vec{v}, mpk) \rightarrow tok. \end{array} \right] = 1$$

### E.2 Details of $\Pi_5$ .

The proof of  $\Pi_5 = \text{ZKSoK}\{(a, b_1, \dots, b_l) : \tilde{A} = \tilde{g}^a \wedge \tilde{B}_i = \tilde{g}^{b_i}, \forall 1 \leq i \leq l\}$  is presented as below.

**Prove:** choose  $(z_a, z_1, \dots, z_l) \xleftarrow{R} \mathbb{Z}_p^*$ , compute  $R_a = \tilde{g}^{z_a}$ ,  $\tilde{R}_1 = \tilde{g}^{z_1}, \dots, \tilde{R}_l = \tilde{g}^{z_l}$ ,  $c = \text{HASH}(\tilde{A}, \tilde{B}_1, \dots, \tilde{B}_l, R_a, R_1, \dots, R_l)$ ,  $s_a = z_a - c \cdot a$ ,  $s_1 = z_1 - c \cdot b_1, \dots, s_l = z_l - c \cdot b_l$ , and output  $\Pi_5 = (c, s_a, s_1, \dots, s_l)$ .

**Verify:** if  $c = \text{HASH}(\tilde{A}, \tilde{B}_1, \dots, \tilde{B}_l, \tilde{g}^{s_a} \cdot \tilde{A}^c, \tilde{g}^{s_1} \cdot \tilde{B}_1^c, \dots, \tilde{g}^{s_l} \cdot \tilde{B}_l^c)$ , output 1, 0 otherwise.

## E.3 Security Analysis

### E.3.1 Unforgeability of credentials

**Theorem 4.3:** Our PriSign scheme satisfies the unforgeability of credentials if the SDL assumption holds and the PS signature is unforgeable.

**Proof:** The PPT adversary  $\mathcal{A}$  wins the experiment of unforgeability of credentials if he forges a credential presentation of an honest user or an unregistered user in PriSign.ObtTkt algorithm, therefore we distinguish two types of adversary:

Type-1:  $\mathcal{A}$  forges  $icred_{uid^*}$ , where  $\exists uid \in \mathcal{HU}$ , and  $usk_{uid} = usk_{uid^*}$ ;

Type-2:  $\mathcal{A}$  forges  $icred_{uid^*}$ , where  $\forall uid \in \mathcal{HU} \cup \mathcal{CU}$ , and  $usk_{uid} \neq usk_{uid^*}$ ;

where  $usk_{uid}$  is the private key of user  $uid$  and  $icred_{uid}$  is the credential of user  $uid$ .

**Lemma 1.** If there is a type-1 adversary  $\mathcal{A}$  that breaks the unforgeability of credentials with the probability  $\epsilon$ , then there is a simulator  $\mathcal{S}$  that breaks the SDL assumption with the probability  $\frac{\epsilon}{N}$ , where  $N$  is a bound on the number of honest users.

**Proof:** Let  $(g, \tilde{g}, g^w, \tilde{g}^w)$  be a SDL challenge in  $\mathcal{BL}$ .  $\mathcal{S}$  uses  $\mathcal{BL}$  as the parameter, runs  $(pp, msk, mpk, \mathcal{L}) \leftarrow \text{PriSign.Setup}(1^\lambda, q, n, t, k)$ , and send  $(pp, mpk)$  to  $\mathcal{A}$ . Since we are considering a type-1 adversary, there is an honest user with the identity  $uid^*$  that the adversary is trying to emulate.  $\mathcal{S}$  makes a guess on  $uid^* \in \mathcal{HU}$  and answers the oracles' queries as follows:

$\mathcal{O}_{\text{Reg}_U}(uid, \{m_j\}_{j \in [1, q]})$ : if  $uid \neq uid^*$ , then  $\mathcal{S}$  proceeds as usual. Otherwise, it sets  $upk = g^w$  and  $utk = \tilde{g}^w$ , and then  $\mathcal{S}$  completes the remaining operations by simulating ZKSoK  $\Pi_1$ .

$\mathcal{O}_{\text{Cor}_U}(uid)$ : if  $uid \neq uid^*$ , then  $\mathcal{S}$  proceeds as usual. Otherwise, it returns  $\perp$ .

$\mathcal{O}_{\text{Obt}}(uid, \mathcal{D}, \text{CTX})$ : if  $uid \neq uid^*$ , then  $\mathcal{S}$  proceeds as usual. Otherwise, it completes the remaining operations by simulating ZKSoK  $\Pi_2$ .

$\mathcal{O}_{\text{Reg}_I}, \mathcal{O}_{\text{Obt}_I}$ :  $\mathcal{S}$  knows the secret keys of  $\text{CA}$  and the ticket issuer, so it can perfectly simulate these oracles.

If  $\mathcal{S}$  guesses the  $uid^*$  successfully, then the simulations of the oracles is perfect, and the probability of its occurrence is  $\frac{1}{N}$ . In this case, if  $\mathcal{A}$  successfully forges a credential presentation  $pst^*$  of user  $uid^*$ , then  $\mathcal{S}$  can use the knowledge extractor of  $\Pi_2$  to recover  $w$ , which is a valid solution to the SDL assumption. The probability of success for  $\mathcal{S}$  is  $\frac{\epsilon}{N}$ .

**Lemma 2.** If there is a type-2 adversary  $\mathcal{A}$  that breaks the unforgeability of credentials with the probability  $\epsilon$ , then there is a simulator  $\mathcal{S}$  that breaks the unforgeability of the PS signature with the same probability.

**Proof:**  $\mathcal{S}$  runs the unforgeability game of the PS signature and so receives a public parameters  $\mathcal{BL}$  and public key  $pk =$

$(\tilde{X}, \tilde{Y}_0, \dots, \tilde{Y}_q)$ .  $\mathcal{S}$  sets  $mpk_i = pk$ , uses  $\mathcal{BL}$  as the parameter, runs  $(pp, msk, mpk, \mathcal{L}) \leftarrow \text{PriSign.Setup}(1^\lambda, q, n, t, k)$ , and sends  $(pp, mpk)$  to  $\mathcal{A}$ .  $\mathcal{S}$  can query the signature oracle of PS,  $\mathcal{O}_{PS.\text{Sign}}(\cdot)$ , and answer oracles queries as follows:

$\mathcal{O}_{\text{Reg}_U}(uid, \{m_j\}_{j \in [1, q]})$ :  $\mathcal{S}$  generates  $(usk_{uid}, upk_{uid}, utk_{uid})$  for user  $uid$ , and submits  $(usk_{uid}, m_1, \dots, m_q)$  to the signature oracle  $\mathcal{O}_{PS.\text{Sign}}(\cdot)$ . It then receives a PS signature  $\sigma$  and sets  $ucred = \sigma$ .

$\mathcal{O}_{\text{Reg}_I}$ :  $\mathcal{S}$  knows CA's secret keys used to issue credential for the ticket issuer, so it can perfectly simulate this oracle.

$\mathcal{O}_{\text{Cor}_U}, \mathcal{O}_{\text{Obt}}, \mathcal{O}_{\text{Obt}_I}$ :  $\mathcal{S}$  knows the secret keys of the ticket issuer and all honest users, so it can perfectly simulate these oracles.

$\mathcal{S}$  can simulate these oracles perfectly and never aborts. Since we are considering a type-2 adversary, the adversary outputs a valid credential presentation  $pst = (\{m_j\}_{j \in [1, q]}, \sigma'_1, \sigma'_2, \mu, \nu, \kappa, \Pi_2)$  with the probability  $\epsilon$  at the end of the experiment;  $\mathcal{S}$  can recover  $usk_{uid^*}$  using the extractor of  $\Pi_2$  and  $\forall uid \in \mathcal{HU} \cup \mathcal{CU}, usk_{uid^*} \neq usk_{uid}$ . So  $\mathcal{S}$  forges a valid PS signature  $(\sigma'_1, \sigma'_2)$  on the message  $(usk_{uid^*}, \{m_j\}_{j \in [1, q]})$  with the probability  $\epsilon$ .

### E.3.2 Unforgeability of tokens

**Theorem 4.4:** Our PriSign scheme satisfies the unforgeability of tokens if the PS signature is unforgeable.

**Proof:**  $\mathcal{S}$  runs the unforgeability game of the PS signature and so receives the public parameters  $\mathcal{BL}$  and public key  $pk = (\tilde{A}, \tilde{B}_0, \tilde{B}_1, B_0, B_1)$ .  $\mathcal{S}$  uses  $\mathcal{BL}$  as the parameter, runs  $(pp, msk, mpk, \mathcal{L}) \leftarrow \text{PriSign.Setup}(1^\lambda, q, n, t, k)$ , and sends  $(pp, mpk)$  to  $\mathcal{A}$ .  $\mathcal{S}$  can query the signature oracle of PS  $\mathcal{O}_{PS.\text{Sign}}(\cdot)$  and answer oracles queries as follows:

$\mathcal{O}_{\text{Reg}_I}()$ :  $\mathcal{S}$  sets the ticket issuer's public key  $ipk = pk$  and issues credential for the issuer.

$\mathcal{O}_{\text{Obt}}(uid, \mathcal{D}, \text{CTX})$ :  $\mathcal{S}$  generates  $dsid$  and  $VP$  for a ticket, and submits  $(dsid, VP)$  to the signature oracle  $\mathcal{O}_{PS.\text{Sign}}(\cdot)$ . It then receives a PS signature  $\sigma$  and sets the ticket  $\tau = \sigma$ .

$\mathcal{O}_{\text{Iss}_V}, \mathcal{O}_{\text{Reg}_U}, \mathcal{O}_{\text{Cor}_U}, \mathcal{O}_{\text{Sign}}$ :  $\mathcal{S}$  knows the secret keys of CA and all honest users, so it can perfectly simulate these oracles.

$\mathcal{S}$  can simulate these oracles perfectly and never aborts. At the end of the experiment, the adversary outputs a forged-yet-valid token  $tok = (CM, CT)$  with the probability  $\epsilon$ ;  $\mathcal{S}$  can recover  $tok' = (\{dsid, VP\}, \tau'_1, \tau'_2)$  using the poly key of the verifier. Since  $tok' \notin \mathcal{Q}_{\text{Tok}}$ ,  $\mathcal{S}$  forges a valid PS signature  $(\tau'_1, \tau'_2)$  on the message  $(dsid, VP)$  with the probability  $\epsilon$ .

### E.3.3 Unlinkability of credentials

**Theorem 4.5:** Our PriSign scheme satisfies the unlinkability of credentials if the DDH assumption holds in  $\mathbb{G}_1$ .

**Proof:** Let  $(g, g^{w_1}, g^{w_2}, g^{w_3})$  be a DDH challenge in  $\mathbb{G}_1$ .  $\mathcal{S}$  uses  $(\mathbb{G}_1, g)$  as the parameter, runs  $(pp, msk, mpk, \mathcal{L}) \leftarrow \text{PriSign.Setup}(1^\lambda, q, n, t, k)$ , and sends  $(pp, mpk)$  to  $\mathcal{A}$ . In the experiment,  $\mathcal{S}$  makes a guess on  $uid^* \in \mathcal{HU}$  that the adversary is trying to break, and answers the oracles' queries as follows:

$\mathcal{O}_{\text{Reg}_U}(uid, \{m_j\}_{j \in [1, q]})$ : If  $uid \neq uid^*$ , then  $\mathcal{S}$  proceeds as usual. Otherwise, it assigns  $upk_{uid^*} = g^{w_1}$ . Then, it simulates the ZKSoK  $\Pi_1$ , chooses  $r_1 \xleftarrow{R} \mathbb{Z}_p^*$  and computes  $\sigma_1 = g^{r_1}, \sigma_2 = g^{w_1 y_0 r_1} g^{r_1 \cdot (x + \sum_{j \in [1, q]} m_j y_j)}$ . We note that  $\mathcal{S}$

can use global variables  $\mathcal{Q}_{\text{TKT}}$  to trace user identities directly without tracing keys.

$\mathcal{O}_{\text{Cor}_U}(uid)$ : If  $uid \neq uid^*$ , then  $\mathcal{S}$  proceeds as usual. Otherwise, it returns  $\perp$ .

$\mathcal{O}_{\text{Obt}}, \mathcal{O}_{\text{Obt}_U}$ : If  $uid \neq uid^*$ , then  $\mathcal{S}$  proceeds as usual. Otherwise, it simulates the ZKSoK  $\Pi_2$ .

$\mathcal{O}_{\text{Reg}_I}, \mathcal{O}_{\text{Cor}_I}, \mathcal{O}_{\text{Iss}_V}$ :  $\mathcal{S}$  knows the secret keys of CA, the ticket issuer and all verifiers, so it can perfectly simulate these oracles.

At some stage in the experiment,  $\mathcal{A}$  outputs the identities  $uid_0$  and  $uid_1$  of two honest users along with an attribute disclosure policy  $\mathcal{D}^*$ . If  $uid_b \neq uid^*$ , then  $\mathcal{S}$  aborts. Otherwise, it proceeds as follows.

$\mathcal{O}_{\text{UnCred}_b}(uid_0, uid_1, \mathcal{D}, \text{CTX})$ :  $\mathcal{S}$  chooses  $r_2 \xleftarrow{R} \mathbb{Z}_p^*$ , computes  $\sigma'_1 = (g^{w_2})^{r_1}, \sigma'_2 = \sigma_2^{w_2} = g^{w_3 y_0 r_1} (g^{w_2})^{r_1 \cdot (x + \sum_{j \in [1, q]} m_j y_j)}, \mu = (g^{w_3})^{r_1}, \nu = \sigma_1^{r_2}, \kappa = \tilde{X} \prod_{j \in [1, q]/\mathcal{D}} \tilde{Y}_j^{m_j} \tilde{g}^{r_2}$ . Then, it simulates the ZKSoK  $\Pi_2$  and completes the remaining operations.

If  $w_1 \cdot w_2 = w_3$ , then we can see that  $(\sigma'_1, \sigma'_2, \mu, \nu, \kappa)$  are identically distributed as in the PriSign.ObtTkt algorithm. Otherwise,  $w_3$  is random element, which means that  $\sigma'_2$  is random. Therefore, the behaviors of  $\mathcal{A}$  can be used to solve the DDH assumption in  $\mathbb{G}_1$ , unless  $\mathcal{S}$  aborts. The advantage of  $\mathcal{S}$  is at least  $\frac{\epsilon}{N}$ , where  $N$  is a bound on the number of honest users.

### E.3.4 Unlinkability of tokens

**Theorem 4.6:** Our PriSign scheme satisfies the unlinkability of tokens if the ABCB scheme satisfies the unlinkability.

**Proof:**  $\mathcal{S}$  runs the unlinkability game of the ABCB scheme and so receives the public parameters  $\mathcal{BL}$  and public key  $pk = (\tilde{A}, \tilde{B}_0, \tilde{B}_1, B_0, B_1)$ .  $\mathcal{S}$  uses  $\mathcal{BL}$  as the parameter, runs  $(pp, msk, mpk, \mathcal{L}) \leftarrow \text{PriSign.Setup}(1^\lambda, q, n, t, k)$ , and sends  $(pp, mpk)$  to  $\mathcal{A}$ .  $\mathcal{S}$  can query the oracles of ABCB and answer oracles queries as follows:

$\mathcal{O}_{\text{Iss}_V}, \mathcal{O}_{\text{Cor}_V}, \mathcal{O}_{\text{Reg}_U}, \mathcal{O}_{\text{Cor}_U}, \mathcal{O}_{\text{Obt}_U}, \mathcal{O}_{\text{Sign}}$ :  $\mathcal{S}$  knows the secret keys of CA and all users, so it can perfectly simulate these oracles.

$\mathcal{O}_{\text{Reg}_I}()$ :  $\mathcal{S}$  sets the ticket issuer's public key  $ipk = pk$  and issues credential for the issuer.

$\mathcal{O}_{\text{Obt}}(uid, \mathcal{D}, \text{CTX})$ :  $\mathcal{S}$  generates  $dsid$  and  $VP$  for a ticket, and submits  $(dsid, VP)$  to the ABCB's issuing oracle  $\mathcal{O}_{\text{ABCB.Issue}}(\cdot)$ . It then receives a credential  $\sigma$  and sets the ticket  $\tau = \sigma$ .

At some stage in the experiment,  $\mathcal{A}$  outputs two honest user  $uid_0$  and  $uid_1$  and a designated verifier  $vid$  with the policy  $\vec{v}$ .

$\mathcal{O}_{\text{UnTkt}_b}(uid_0, uid_1, \vec{u}, vid, \vec{v}, \text{CTX})$ : If  $uid_0 \notin \mathcal{HU}$  or  $uid_1 \notin \mathcal{HU}$ , then  $\mathcal{S}$  aborts. Otherwise, it submits  $uid_0, uid_1$  to the challenge oracle  $\mathcal{O}_{\text{ABCB.Unl}_b}(\cdot)$ , and then receives a token  $tok'_b$ . It encrypts  $tok'_b$  with  $\vec{u}$  and returns the ciphertext  $tok_b$ .

$\mathcal{S}$  can simulate these oracles perfectly and never aborts. At the end of the experiment, the adversary outputs a guess  $b^*$  with the probability  $\epsilon$ . Because the adversary knows the policy key, it can decrypts  $tok_b$ , then outputs  $tok'_b$  and make a guess. So  $\mathcal{S}$  can return  $\mathcal{A}$ 's guess as its own, thus turning  $\mathcal{A}$ 's advantage in attacking PriSign system into an advantage in attacking ABCB scheme.
